# Supplementary material
Source: ML conference proceedings conference paper supplement (https://openaccess.thecvf.com/content/ICCV2025/html/Wu_On-Device_Diffusion_Transformer_ICCV_2025_paper.html)
Supplement: Supplementary file 1 [file 01129_supp.pdf › 01129_supp.pdf]

# On-Device Diffusion Transformer Policy for Efficient Robot Manipulation

## Supplementary Material

Figure A1. Real-world experiments for DP-T (first column) and MoDE (other columns). Task descriptions are shown below each image. **This figure contains an animated video. For optimal viewing, please zoom in and use a professional PDF reader.**

### G. Supplementary Material

The supplement consists of the following sections:

- Section H presents the extensive experimental results on Robomimic dataset based on the DiffusionPolicy Transformer (DP-T) model.
- Section I describes the real-world experiments based on DP-T and MoDE models, including the experimental setup and results.

We provide a webpage to visualize the results of the pruned models and original models, which can be found at <https://weleen.github.io/LightDP/>.

### H. Extensive Experiments based on DP-T

| Models      | Lift-ph | Can-ph | Square-ph | Transport-ph | Push-T | ToolHang-ph |
|-------------|---------|--------|-----------|--------------|--------|-------------|
| DP-T        | 1.000   | 1.000  | 1.000     | 0.955        | 0.772  | 0.713       |
| DP-T-D6/6-8 | 1.000   | 1.000  | 1.000     | 0.950        | 0.752  | 0.707       |

| Models      | Lift-mh | Can-mh | Square-mh | Transport-mh | Kitchen | Block Push |
|-------------|---------|--------|-----------|--------------|---------|------------|
| DP-T        | 1.000   | 1.000  | 0.940     | 0.727        | 0.574   | 1.000      |
| DP-T-D6/6-8 | 1.000   | 1.000  | 0.955     | 0.773        | 0.571   | 1.000      |

Table A1. The extensive evaluation on DP-T tasks (Push-T and Robomimic), showing the success rates of the original model (DP-T) and the pruned model (DP-T-D6/6-8). The pruned model maintains performance across most tasks, with only minor drops in success rates.

In Table A1, we have provided success rate on all tasks (*i.e.*, Push-T and Robomimic) in the Diffusion Policy [6] work, which indicate that the pruned model DP-T-D6/6-8 preserves the baseline’s performance on most tasks, and the performance only drops by less than 0.02 on the tasks.

### I. Real-world Experiments

Based on two models DP-T and MoDE, we deploy our *LightDP* on two robotic arms (an Inovo robot for DP-T

| Models      | Task 1 | Models        | Task 2 | Task 3 | Task 4 |
|-------------|--------|---------------|--------|--------|--------|
| DP-T        | 0.80   | MoDE          | 0.80   | 0.55   | 0.30   |
| DP-T-D6/6-8 | 0.75   | MoDE-10/10-12 | 0.75   | 0.50   | 0.30   |

Table A2. Real-world evaluation results based on DP-T (on a Inovo Robot) and MoDE (on a Lebai Robot). The success rates are shown for each task, with the pruned model (DP-T-D6/6-8 and MoDE-10/10-12) maintaining performance across most tasks, with only minor drops in success rates.

and a Lebai robot for MoDE), where each task is executed by 20 times. As shown in Figure A1 and Table A2, the pruned model achieves a comparable success rate on these real-world tasks. Considering that most household users are often redundant to purchase advanced device, we selected the most accessible and portable device (*i.e.*, iPhone) as the computing platform for our robotic development setup. Moreover, we also evaluate our approach based on a Jetson Orin NX (16 GB, Jetpack 5.1.1), the latency is 244.68ms (*resp.*, 37.69ms) based on DP-T (*resp.*, DP-T-D6/6-8).
